# Supplementary material
Source: PubMed Central journal article supplement (PMC4615342)

Supplemental Figure 1 Gene expression levels of ABC-transporters

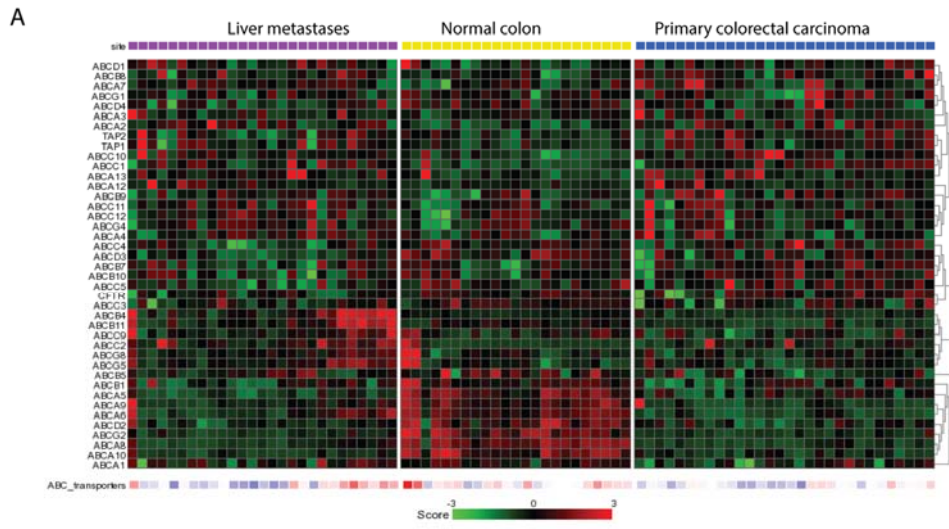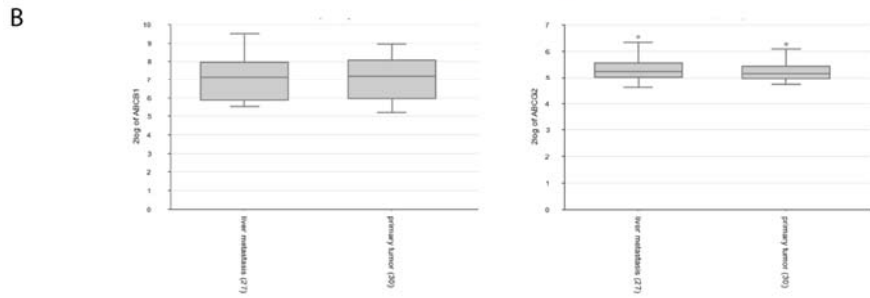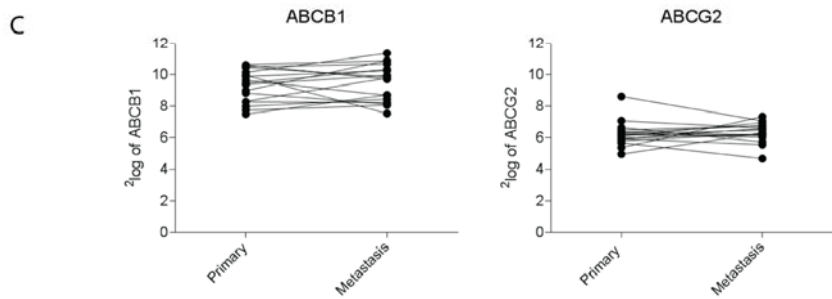

Supplement: jcav06p1079s1.pdf [file jcav06p1079s1.pdf]
